# Supplementary material for: The performance of the IMOMO and IMOHC integrated methods in predicting geometry, frequency and energy of reaction and activation in hydrogen abstraction reactionsElectronic supplementary information (ESI) available: tables of calculated harmonic vibrational frequencies for all stationary points, reactants, products and saddle points, at the single and integrated levels (a total of 147 calculations). See http://www.rsc.org/suppdata/cp/b1/b109961m/
Source: Royal Society of Chemistry journal article supplement (doi:10.1039/b109961m), 2002-04-11
Supplement: tables.doc [file tables.doc]

Supplementary material for “The performance of the IMOMO and IMOHC integrated methods in predicting geometry, frequency and energy of reaction and activation in hydrogen abstraction reactions.” by J.Espinosa-García, Phys.Chem.Chem.Phys.

**Harmonic vibrational frequencies (cm-1)**

**Reaction 1. CH3F + H  SP  CH2F + H2**

**1.1. Saddle point**

IMOMO IMOMO IMOHC IMOHC

# MP2 HF AM1 MP2:HF MP2:AM1 MP2:HF MP2:AM1

3301 3356 3099 3343 3347 3233 3249

3181 3253 3040 3221 3138 3228 3187

1748 1620 2700 1838 1579 1838 1552

1550 1526 1494 1566 1506 1554 1470

1305 1358 1395 1296 1412 1300 1383

1300 1339 1354 1285 1336 1280 1337

1230 1287 1335 1245 1314 1245 1328

1178 1245 1191 1231 1228 1210 1211

1142 1197 1163 1164 1149 1161 1177

561 572 90 559 553 558 595

300 318 70 300 378 300 393

1956i 2334i 603i 1877i 2158i 1883i 2321i

**1.2. CH3F**

IMOMO IMOMO IMOHC IMOHC

# MP2 HF AM1 MP2:HF MP2:AM1 MP2:HF MP2:AM1

3241 3287 3121 3279 3180 3283 3226

3241 3287 3121 3279 3180 3283 3226

3136 3204 3036 3171 3085 3180 3168

1566 1636 1502 1580 1543 1575 1540

1566 1636 1502 1580 1543 1575 1540

1557 1633 1367 1573 1528 1565 1445

1230 1307 1367 1273 1397 1278 1375

1230 1307 1367 1273 1397 1278 1375

1114 1186 1197 1181 1243 1154 1243

**1.2. CH2F**

IMOMO IMOMO IMOHC IMOHC

# MP2 HF AM1 MP2:HF MP2:AM1 MP2:HF MP2:AM1

3402 3434 3221 3433 3379 3436 3399

3244 3290 3206 3275 3249 3283 3291

1555 1607 1517 1569 1592 1556 1509

1219 1277 1375 1268 1445 1257 1434

1215 1271 1137 1254 1219 1237 1225

766 834 542 804 273 808 423

**Reaction 2. CH3CH3 + H  SP  CH3CH2 + H2**

**2.1. Saddle point**

IMOMO IMOMO IMOHC IMOHC

# MP2 HF AM1 MP2:HF MP2:AM1 MP2:HF MP2:AM1

3298 3320 3157 3311 3304 3310 3316

3225 3248 3132 3247 3210 3257 3254

3217 3247 3075 3240 3144 3235 3143

3202 3237 3059 3216 3048 3220 3053

3128 3180 3051 3178 3043 3172 3039

1831 1624 2718 1849 1726 1844 1741

1556 1620 1441 1620 1540 1619 1488

1556 1597 1419 1620 1444 1619 1439

1534 1543 1393 1560 1389 1554 1390

1463 1502 1393 1523 1383 1517 1384

1284 1352 1372 1316 1322 1320 1279

1262 1318 1358 1260 1272 1253 1271

1255 1305 1246 1245 1243 1245 1238

1162 1219 1181 1190 1207 1194 1204

1072 1074 1165 1068 1118 1057 1115

900 940 886 919 938 921 937

861 896 875 879 917 877 926

597 601 200 595 577 593 589

318 333 110 322 353 325 361

216 221 29 209 152 211 322

1782i 2221i 567i 1774i 1923i 1773i 1907i

**2.2. CH3CH3**

IMOMO IMOMO IMOHC IMOHC

# MP2 HF AM1 MP2:HF MP2:AM1 MP2:HF MP2:AM1

3241* 3257* 3160* 3254* 3231* 3255* 3258*

3220* 3232* 3072* 3229* 3154 3230* 3204

3138* 3180* 3049* 3181 3134 3181 3157

1570* 1632* 1446 3149 3053* 3157 3063*

1567* 1627* 1431 1630* 1548* 1630* 1556*

1490 1564 1395* 1571* 1505 1571* 1435

1460 1531 1393* 1553 1436 1551 1395*

1270* 1329* 1245 1486 1394* 1466 1393

1051 1058 1182* 1310* 1266 1313* 1213

847* 885* 889* 1055 1211* 1039 1204*

338 327 200 866* 914* 865* 913*

327 207 327 202

* Doubly degenerate

**2.3. CH3CH2**

IMOMO IMOMO IMOHC IMOHC

# MP2 HF AM1 MP2:HF MP2:AM1 MP2:HF MP2:AM1

3372 3386 3237 3388 3413 3387 3416

3258 3285 3224 3275 3297 3281 3327

3232 3250 3158 3250 3158 3250 3158

3229 3246 3079 3246 3078 3245 3081

3184 3210 3066 3210 3066 3210 3066

3131 3180 3062 3180 3062 3180 3063

3129 3176 3004 3176 3001 3175 3005

1569 1635 1467 1634 1571 1634 1501

1561 1625 1428 1625 1445 1625 1436

1550 1616 1395 1615 1428 1615 1428

1538 1592 1392 1561 1394 1547 1395

1457 1539 1392 1539 1392 1537 1391

1382 1461 1378 1458 1391 1458 1387

1356 1420 1257 1419 1264 1419 1247

1246 1304 1202 1296 1202 1298 1200

1138 1168 1185 1167 1202 1161 1197

1083 1113 1165 1112 1185 1106 1185

937 958 1018 953 1020 949 1016

922 954 930 948 963 945 969

765 795 792 790 806 789 813

542 537 722 530 510 531 575

342 352 395 352 360 353 405

270 270 154 269 155 270 383

120 128 115 118 117 121 153

**Reaction 3. FCH2CH3 + H  SP  FCH2CH2 + H2**

**3.1. Saddle point**

IMOMO IMOMO IMOHC IMOHC

# MP2 HF AM1 MP2:HF MP2:AM1 MP2:HF MP2:AM1

3319 3344 3142 3334 3316 3334 3325

3217 3277 3077 3276 3218 3276 3247

3214 3259 3062 3232 3057 3238 3061

3149 3229 2997 3229 2990 3228 2994

1847 1659 2718 1872 1829 1871 1838

1584 1612 1495 1657 1535 1658 1486

1542 1556 1412 1579 1468 1573 1471

1448 1487 1386 1511 1391 1505 1386

1341 1413 1380 1410 1360 1410 1355

1250 1324 1355 1292 1280 1296 1239

1250 1308 1346 1247 1240 1240 1238

1226 1285 1240 1227 1235 1226 1231

1118 1182 1198 1172 1200 1173 1193

1095 1148 1151 1123 1181 1118 1187

968 1007 1007 984 1032 977 1032

839 877 841 859 868 859 879

609 615 476 602 561 602 579

455 483 137 479 515 478 531

263 284 43 274 306 274 479

140 142 36 133 63 132 394

1760i 2252i 584i 1794i 1801i 1789i 1790i

**3.2. FCH2CH3**

IMOMO IMOMO IMOHC IMOHC

# MP2 HF AM1 MP2:HF MP2:AM1 MP2:HF MP2:AM1

3241 3276 3138 3275 3223 3278 3262

3236 3267 3108 3268 3155 3259 3256

3214 3248 3055 3245 3099 3251 3194

3152 3209 3045 3204 3099 3214 3082

3137 3196 3032 3169 3010 3168 3017

1590 1664 1490 1662 1563 1663 1553

1565 1630 1433 1588 1556 1586 1544

1548 1609 1395 1549 1511 1551 1496

1491 1577 1393 1549 1471 1548 1390

1454 1535 1381 1486 1363 1462 1378

1342 1418 1349 1413 1331 1410 1353

1232 1303 1224 1287 1226 1291 1236

1170 1235 1198 1219 1208 1223 1201

1125 1168 1156 1160 1187 1152 1182

929 966 1033 952 1094 943 1063

835 875 838 856 827 854 880

414 439 486 434 505 434 537

285 260 217 254 348 273 218

**3.3. FCH2CH2**

IMOMO IMOMO IMOHC IMOHC

# MP2 HF AM1 MP2:HF MP2:AM1 MP2:HF MP2:AM1

3394 3409 3238 3411 3414 3411

3274 3302 3230 3292 3294 3298

3215 3273 3051 3273 3050 3273

3151 3225 2986 3225 2983 3225

1584 1657 1483 1655 1552 1656

1547 1604 1401 1578 1475 1566

1442 1528 1374 1519 1389 1514

1329 1406 1350 1404 1353 1404

1222 1289 1234 1280 1251 1283

1130 1161 1227 1159 1227 1152

1031 1098 1122 1097 1170 1085

824 856 818 844 853 843

640 639 755 638 600 637

383 401 465 404 393 404

87 95 206 84 110 86

**Reaction 4. CH3CH2CH3 + H  SP  CH3CH2CH2 + H2**

**4.1. Saddle point**

IMOMO IMOMO IMOHC IMOHC

# MP2 HF AM1 MP2:HF MP2:AM1 MP2:HF MP2:AM1

3285 3311 3157 3301 3305 3300 3324

3229 3250 3135 3250 3211 3245 3264

3226 3246 3090 3246 3157 3242 3157

3189 3233 3070 3218 3086 3217 3088

3189 3218 3063 3207 3065 3212 3063

3135 3189 3061 3188 3062 3188 3062

3128 3177 3014 3177 3009 3177 3012

1847 1636 2737 1860 1750 1855 1778

1568 1626 1439 1634 1539 1635 1485

1561 1619 1433 1625 1433 1625 1433

1550 1595 1408 1618 1427 1618 1417

1530 1547 1406 1549 1397 1545 1399

1463 1521 1394 1545 1394 1538 1395

1394 1452 1394 1464 1394 1465 1393

1362 1427 1381 1423 1300 1424 1269

1272 1341 1358 1313 1267 1316 1266

1251 1313 1250 1252 1248 1247 1242

1248 1303 1237 1239 1213 1240 1228

1163 1218 1199 1198 1211 1199 1221

1105 1120 1189 1116 1193 1111 1190

981 1027 1024 995 1041 995 1032

944 982 973 968 1002 969 999

932 947 957 946 979 938 983

774 808 798 802 812 801 817

596 606 407 595 575 595 580

415 435 177 429 454 429 448

266 282 132 274 300 274 300

265 265 120 266 160 264 217

134 141 100 131 89 132 135

1759i 2226i 568i 1763i 1875i 1764i 1875i

**4.2. CH3CH2CH3**

IMOMO IMOMO IMOHC IMOHC

# MP2 HF AM1 MP2:HF MP2:AM1 MP2:HF MP2:AM1

1. 3250 3157 3248 3232 3246 3269

3223 3243 3157 3241 3231 3245 3257

3221 3239 3093 3235 3157 3239 3196

3221 3236 3067 3233 3135 3231 3154

3180 3201 3062 3201 3086 3200 3090

3132 3181 3062 3179 3064 3178 3061

3127 3173 3061 3173 3061 3173 3060

3125 3173 3014 3143 3009 3150 3015

1575 1641 1443 1636 1551 1637 1575

1571 1635 1437 1628 1549 1627 1542

1561 1625 1412 1620 1502 1620 1441

1554 1619 1408 1571 1440 1571 1414

1552 1617 1396 1566 1415 1566 1409

1477 1555 1395 1549 1409 1549 1396

1464 1546 1395 1509 1395 1501 1394

1416 1491 1392 1471 1395 1458 1391

1362 1426 1250 1423 1263 1423 1248

1263 1322 1238 1309 1246 1313 1228

1220 1278 1200 1264 1221 1267 1213

1111 1124 1191 1122 1198 1116 1198

960 1108 1031 991 1055 991 1045

937 979 984 964 1002 965 997

915 927 960 922 980 913 978

769 803 799 796 807 796 808

376 393 411 391 419 390 493

291 292 182 292 189 292 412

237 234 137 234 144 233 221

**4.3. CH3CH2CH2**

IMOMO IMOMO IMOHC IMOHC

# MP2 HF AM1 MP2:HF MP2:AM1 MP2:HF MP2:AM1

3372 3386 3237 3388 3413 3387 3416

3258 3285 3224 3275 3297 3281 3327

3232 3250 3158 3250 3158 3250 3158

3229 3246 3079 3246 3078 3245 3081

3184 3210 3066 3210 3066 3210 3066

3131 3180 3062 3180 3062 3180 3063

3129 3176 3004 3176 3001 3175 3005

1569 1635 1467 1634 1571 1634 1501

1561 1625 1428 1625 1445 1625 1436

1550 1616 1395 1615 1428 1615 1428

1538 1592 1392 1561 1394 1547 1395

1457 1539 1392 1539 1392 1537 1391

1382 1461 1378 1458 1391 1458 1387

1356 1420 1257 1419 1264 1419 1247

1246 1304 1202 1296 1202 1298 1200

1138 1168 1185 1167 1202 1161 1197

1083 1113 1165 1112 1185 1106 1185

937 958 1018 953 1020 949 1016

922 954 930 948 963 945 969

765 795 792 790 806 789 813

542 537 722 530 510 531 575

342 352 395 352 360 353 405

270 270 154 269 155 270 383

120 128 115 118 117 121 153

**Reaction 5. CH3CH2CH2CH3 + H  SP  CH3CH2CH2CH2 + H2**

**5.1. Saddle point**

IMOMO IMOMO IMOHC IMOHC

# MP2 HF AM1 MP2:HF MP2:AM1 MP2:HF MP2:AM1

3285 3312 3157 3301 3305 3301 3317

3226 3248 3135 3248 3210 3248 3252

3223 3248 3100 3244 3156 3244 3155

3189 3235 3082 3220 3099 3220 3099

3187 3220 3069 3207 3080 3213 3081

3167 3196 3064 3198 3064 3197 3062

1. 3182 3061 3181 3061 3181 3060

3128 3178 3027 3179 3027 3178 3027

3119 3171 3006 3172 3005 3171 3006

1842 1638 2738 1855 1748 1851 1766

1569 1627 1449 1637 1539 1637 1485

1562 1624 1438 1627 1445 1627 1443

1554 1618 1423 1623 1436 1623 1435

1545 1595 1408 1617 1406 1617 1406

1528 1551 1406 1552 1404 1550 1405

1466 1535 1394 1549 1394 1541 1395

1431 1497 1394 1515 1394 1511 1394

1374 1444 1384 1444 1356 1444 1344

1343 1414 1359 1419 1303 1419 1271

1338 1405 1347 1399 1268 1400 1265

1266 1334 1258 1310 1252 1312 1247

1251 1312 1254 1252 1242 1247 1244

1248 1303 1222 1241 1218 1241 1214

1164 1221 1210 1209 1213 1210 1211

1115 1129 1208 1127 1204 1123 1204

1070 1087 1181 1078 1191 1070 1190

1010 1058 1024 1030 1038 1030 1035

993 1036 994 1026 1010 1027 1011

905 928 953 924 983 921 980

839 876 868 868 882 867 887

754 786 766 784 773 783 775

594 604 469 593 575 594 581

435 453 296 451 475 448 471

350 369 168 362 387 362 389

258 261 146 261 245 261 248

213 227 107 223 167 223 244

130 136 101 132 91 132 167

124 126 80 122 76 122 87

1762i 2224i 567i 1769i 1898i 1768i 1878i

**5.2. CH3CH2CH2CH3**

IMOMO IMOMO IMOHC IMOHC

## MP2 HF AM1 MP2:HF MP2:AM1 MP2:HF MP2:AM1

3224 3247 3157 3246 3253 3244 3264

3222 3241 3157 3241 3159 3242 3252

3222 3241 3101 3238 3157 3239 3182

3221 3240 3084 3236 3102 3236 3152

3179 3206 3065 3205 3097 3205 3100

3159 3185 3064 3185 3095 3186 3083

1. 3179 3061 3174 3078 3176 3060

3129 3175 3061 3169 3028 3170 3057

3121 3170 3027 3164 3008 3165 3028

3114 3163 3006 3148 3004 3151 3007

1572 1640 1449 1638 1564 1637 1579

1568 1633 1439 1627 1563 1627 1536

1563 1628 1435 1627 1525 1627 1446

1563 1626 1408 1618 1448 1617 1438

1552 1619 1406 1571 1412 1572 1409

1546 1618 1395 1567 1408 1568 1407

1468 1553 1394 1553 1407 1552 1397

1468 1550 1394 1533 1375 1532 1396

1449 1532 1394 1490 1375 1472 1394

1375 1445 1350 1444 1356 1444 1356

1362 1441 1257 1435 1271 1435 1261

1334 1401 1255 1395 1260 1396 1247

1257 1317 1221 1308 1242 1310 1243

1211 1267 1211 1256 1230 1259 1213

1118 1133 1209 1132 1210 1129 1207

1065 1092 1182 1083 1184 1078 1195

1010 1050 1033 1041 1077 1039 1063

990 1035 996 1025 1014 1027 1010

878 900 962 893 950 887 970

834 872 870 862 873 862 880

753 785 766 782 764 782 770

436 453 472 451 476 448 618

276 279 299 278 367 278 469

265 277 171 277 297 277 261

237 241 155 239 283 240 216

127 126 76 126 88 127 182

**5.3. CH3CH2CH2CH2**

IMOMO IMOMO IMOHC IMOHC

## MP2 HF AM1 MP2:HF MP2:AM1 MP2:HF MP2:AM1

3373 3386 3237 3389 3413 3390 3418

3258 3286 3224 3277 3297 3284 3331

3225 3246 3156 3246 3156 3246 3156

3222 3241 3099 3242 3099 3242 3099

3189 3216 3075 3216 3073 3216 3075

3167 3194 3064 3195 3064 3195 3064

3131 3179 3061 3179 3061 3179 3061

3126 3176 3026 3176 3026 3176 3027

3114 3167 3001 3167 3000 3167 3002

1568 1637 1469 1636 1570 1636 1501

1562 1627 1438 1626 1453 1626 1448

1554 1622 1409 1621 1438 1621 1437

1550 1618 1402 1616 1406 1616 1405

1534 1591 1394 1559 1395 1549 1396

1465 1549 1394 1549 1394 1543 1395

1419 1511 1390 1510 1394 1509 1393

1371 1442 1347 1441 1365 1441 1352

1333 1412 1274 1411 1279 1411 1266

1329 1394 1237 1392 1238 1392 1237

1243 1303 1201 1297 1212 1299 1208

1132 1185 1198 1185 1198 1185 1197

1121 1134 1197 1132 1198 1122 1196

1078 1090 1161 1088 1187 1080 1186

978 1019 992 1013 998 1014 1000

910 938 977 937 992 937 992

825 859 849 853 871 852 880

749 781 766 779 772 778 774

536 538 723 527 521 525 575

405 416 460 412 422 411 449

262 274 300 273 291 275 406

256 260 265 259 164 259 296

134 134 116 135 114 134 162

118 126 77 116 78 116 80

**Reaction 6. (CH3)2CHCH3 + H  SP  (CH3)2CHCH2 + H2**

**6.1. Saddle point**

IMOMO IMOMO IMOHC IMOHC

# MP2 HF AM1 MP2:HF MP2:AM1 MP2:HF MP2:AM1

3280 3312 3154 3302 3308 3330 3318

3225 3252 3154 3253 3211 3253 3241

3222 3247 3136 3247 3156 3248 3156

3222 3246 3075 3246 3156 3246 3156

3220 3243 3064 3243 3066 3243 3065

3184 3236 3064 3210 3066 3245 3065

3125 3181 3062 3182 3064 3182 3064

3123 3176 3059 3176 3063 3177 3063

3073 3131 3018 3130 2988 3128 2994

1848 1639 2617 1862 1741 1853 1749

1573 1633 1448 1638 1538 1638 1486

1567 1623 1433 1633 1450 1633 1441

1556 1616 1423 1623 1430 1623 1431

1550 1590 1405 1616 1430 1616 1422

1520 1557 1404 1563 1411 1562 1412

1470 1543 1398 1543 1397 1543 1397

1454 1501 1394 1533 1394 1522 1394

1396 1477 1394 1473 1394 1475 1394

1385 1463 1392 1461 1393 1463 1393

1266 1332 1377 1307 1269 1305 1259

1261 1326 1350 1286 1259 1289 1257

1238 1300 1231 1254 1221 1253 1222

1236 1285 1224 1242 1216 1243 1217

1180 1233 1212 1225 1183 1226 1183

1022 1043 1046 1043 1073 1042 1069

1017 1043 1045 1039 1054 1034 1050

989 1037 1007 1024 1014 1023 1012

964 1018 998 990 1013 989 1009

949 998 981 985 1004 986 1000

836 847 952 845 981 839 980

612 621 485 613 590 614 597

503 523 403 518 535 515 572

376 394 400 394 405 392 537

374 389 289 386 400 386 406

298 310 220 305 296 305 391

267 270 181 269 175 269 324

250 249 154 249 154 249 195

162 159 95 155 101 156 153

1726i 2208i 655i 1747i 1905i 1752i 1894i

**6.2. (CH3)2CHCH3**

IMOMO IMOMO IMOHC IMOHC

# MP2 HF AM1 MP2:HF MP2:AM1 MP2:HF MP2:AM1

3220 3247 3158 3246 3233 3243 3270

3215 3240 3157 3239 3233 3243 3254

3215 3240 3157 3238 3158 3241 3186

3213 3234 3136 3234 3158 3234 3155

3213 3234 3065 3230 3135 3231 3152

3211 3233 3065 3230 3068 3227 3064

3120 3179 3063 3176 3066 3176 3064

3120 3170 3063 3169 3064 3169 3062

3116 3170 3063 3163 3064 3162 3058

3116 3162 3060 3140 3009 3146 3011

1576 1643 1449 1638 1554 1638 1579

1569 1635 1432 1633 1551 1633 1539

1569 1635 1432 1624 1500 1624 1446

1551 1617 1407 1616 1443 1616 1432

1551 1617 1406 1567 1430 1568 1414

1544 1610 1400 1567 1410 1568 1412

1481 1565 1394 1557 1406 1557 1399

1455 1542 1394 1539 1398 1540 1396

1455 1542 1393 1504 1395 1492 1395

1409 1483 1393 1480 1394 1480 1393

1409 1483 1392 1468 1393 1457 1381

1255 1317 1237 1308 1252 1311 1258

1239 1293 1226 1289 1231 1288 1228

1239 1293 1220 1280 1226 1284 1223

1020 1044 1046 1042 1074 1041 1083

1020 1044 1046 1039 1055 1033 1051

987 1038 1005 1024 1014 1022 1014

952 998 1000 993 1011 992 1009

952 998 979 980 1000 981 984

833 846 978 844 981 836 982

437 461 477 460 483 459 599

375 392 397 391 405 390 464

375 392 397 391 400 389 396

278 278 171 278 176 279 378

278 278 171 278 171 279 213

228 226 131 226 132 226 184

**6.3. (CH3)2CHCH2**

IMOMO IMOMO IMOHC IMOHC

# MP2 HF AM1 MP2:HF MP2:AM1 MP2:HF MP2:AM1

3364 3384 3238 3386 3415 3386 3424

3249 3284 3227 3274 3297 3274 3335

3224 3248 3158 3248 3158 3248 3157

3222 3244 3158 3244 3158 3244 3156

3222 3242 3067 3242 3067 3242 3066

3220 3240 3067 3240 3067 3240 3066

3124 3179 3065 3179 3066 3179 3064

3122 3173 3065 3173 3066 3173 3064

3047 3105 2967 3105 2964 3105 2967

1574 1640 1479 1639 1574 1639 1504

1565 1630 1441 1631 1465 1631 1451

1555 1621 1427 1621 1439 1621 1439

1551 1616 1397 1616 1427 1616 1427

1533 1592 1397 1567 1404 1567 1406

1468 1551 1395 1543 1397 1543 1397

1451 1539 1392 1538 1394 1538 1395

1389 1471 1389 1469 1392 1469 1393

1381 1456 1386 1455 1392 1455 1393

1250 1303 1212 1302 1212 1302 1210

1229 1277 1208 1271 1208 1271 1208

1131 1186 1139 1186 1144 1186 1135

1028 1052 1041 1051 1051 1051 1070

1010 1042 1030 1042 1041 1042 1041

978 1020 1017 1014 1019 1014 1012

939 980 986 970 1007 970 1012

850 862 947 862 974 862 976

535 546 718 543 521 543 575

407 428 467 427 422 427 441

380 396 414 395 411 395 427

370 388 400 388 388 388 400

277 281 168 281 170 281 375

248 251 142 251 143 251 172

162 154 99 145 98 145 149

**Reaction 7. (CH3)3CCH3 + H  SP  (CH3)3CCH2 + H2**

**7.1. Saddle point**

IMOMO IMOMO IMOHC IMOHC

# MP2 HF AM1 MP2:HF MP2:AM1 MP2:HF MP2:AM1

3271 3306 3156 3296 3308 3296 3317

3219 3251 3155 3252 3210 3250 3239

3217 3249 3154 3250 3157 3246 3157

3216 3247 3136 3248 3157 3242 3157

3214 3243 3076 3244 3156 3242 3156

3213 3240 3065 3241 3067 3232 3067

3212 3240 3065 3241 3067 3230 3067

3173 3230 3065 3204 3067 3209 3067

3120 3184 3064 3183 3065 3178 3065

3115 3175 3062 3175 3065 3169 3065

3114 3173 3062 3174 3065 3167 3065

1884 1648 2620 1882 1764 1872 1771

1579 1637 1455 1647 1537 1648 1487

1567 1635 1432 1636 1449 1636 1448

1565 1617 1431 1636 1446 1636 1429

1548 1616 1425 1617 1429 1618 1428

1547 1611 1413 1616 1426 1616 1422

1541 1591 1411 1611 1413 1612 1415

1517 1562 1402 1571 1400 1571 1401

1471 1540 1393 1540 1397 1542 1394

1448 1537 1392 1537 1393 1536 1393

1445 1508 1392 1532 1393 1521 1393

1336 1397 1391 1389 1392 1392 1392

1334 1393 1391 1387 1392 1392 1392

1292 1351 1388 1347 1369 1345 1376

1248 1319 1378 1255 1362 1253 1256

1244 1319 1350 1241 1252 1242 1251

1121 1183 1068 1177 1086 1179 1083

1094 1157 1061 1148 1062 1150 1064

992 1045 1026 1045 1040 1046 1033

990 1043 1022 1029 1034 1034 1031

990 1040 1019 1017 1029 1019 1022

977 1006 1007 1001 1013 1000 1013

975 997 1002 990 1010 987 1012

970 996 990 988 1004 983 1005

765 777 978 777 992 771 984

616 631 467 621 591 621 596

469 490 463 485 505 485 582

418 442 461 441 462 442 511

418 439 357 437 457 438 461

358 377 348 374 369 375 411

341 353 291 352 353 351 401

296 300 222 300 288 312 366

296 300 185 300 186 308 317

276 290 185 287 183 286 186

244 247 144 246 147 254 180

165 463 100 161 102 163 151

1690i 2203i 646i 1737i 1887i 1737i 1877i

**7.2. (CH3)3CCH3**

IMOMO IMOMO IMOHC IMOHC

# MP2 HF AM1 MP2:HF MP2:AM1 MP2:HF MP2:AM1

3212 3245 3157 3245 3204 3245 3289

3212 3245 3157 3245 3204 3245 3289

3212 3245 3157 3242 3203 3242 3281

3208 3157 3156 3234 3112 3235 3157

3208 3157 3067 3234 3112 3235 3157

3206 3157 3067 3231 3112 3232 3157

3206 3066 3066 3231 3111 3232 3066

3206 3066 3066 3231 3111 3231 3066

3116 3066 3066 3178 3111 3179 3066

3110 3064 3064 3167 3041 3167 3064

3110 3064 3064 3167 3041 3167 3064

3110 3064 3064 3146 2954 3153 3064

1577 1646 1457 1647 1572 1646 1566

1577 1646 1431 1639 1572 1639 1566

1577 1646 1431 1639 1531 1639 1454

1550 1618 1431 1616 1438 1616 1431

1550 1618 1413 1616 1419 1616 1431

1542 1612 1413 1612 1417 1612 1414

1542 1612 1413 1570 1417 1569 1412

1542 1612 1394 1564 1407 1565 1412

1488 1575 1394 1564 1407 1565 1402

1450 1539 1393 1539 1388 1539 1393

1450 1539 1393 1539 1385 1539 1393

1450 1539 1393 1488 1385 1466 1393

1333 1392 1391 1387 1384 1389 1393

1333 1392 1391 1383 1384 1386 1393

1333 1392 1391 1383 1384 1386 1364

1123 1185 1070 1178 1125 1178 1088

1123 1185 1067 1178 1125 1178 1088

989 1041 1025 1042 1030 1042 1038

989 1041 1024 1028 1030 1029 1038

989 1041 1024 1028 1019 1029 1015

977 999 1007 998 996 991 1013

977 999 1005 992 996 988 1013

977 999 1005 992 988 988 1005

759 772 987 772 983 766 970

424 446 466 447 473 444 465

424 446 463 445 471 444 465

424 446 463 445 454 443 460

340 352 364 351 446 352 348

340 352 349 351 350 352 348

297 300 183 303 350 303 191

297 300 182 303 193 303 182

219 218 121 217 145 217 123

**7.3. (CH3)3CCH2**

IMOMO IMOMO IMOHC IMOHC

# MP2 HF AM1 MP2:HF MP2:AM1 MP2:HF MP2:AM1

3369 3378 3236 3379 3414 3379 3433

3257 3277 3228 3267 3295 3274 3353

3235 3249 3159 3249 3159 3249 3159

3234 3245 3159 3245 3158 3245 3158

3234 3245 3157 3245 3157 3245 3158

3231 3240 3068 3240 3069 3240 3070

3230 3238 3068 3238 3069 3238 3068

3229 3238 3068 3238 3069 3238 3068

3139 3181 3068 3181 3067 3181 3068

3135 3172 3067 3172 3067 3172 3067

3135 3171 3067 3171 3067 3171 3066

1577 1648 1478 1647 1570 1647 1503

1562 1634 1446 1633 1464 1634 1453

1562 1634 1426 1633 1445 1633 1445

1545 1616 1424 1616 1426 1616 1427

1544 1616 1402 1615 1424 1615 1424

1538 1610 1398 1610 1407 1610 1405

1514 1592 1398 1573 1400 1570 1399

1446 1577 1393 1543 1398 1536 1397

1441 1536 1392 1536 1393 1534 1393

1439 1534 1391 1534 1392 1529 1393

1343 1395 1385 1392 1391 1392 1391

1325 1384 1383 1380 1388 1382 1388

1271 1329 1348 1329 1343 1328 1344

1100 1172 1057 1168 1070 1169 1075

1062 1129 1054 1129 1061 1129 1050

987 1041 1048 1041 1049 1041 1038

975 1028 1015 1023 1018 1024 1028

971 1015 1013 1013 1012 1007 1013

963 1001 1002 1002 1012 998 1013

942 977 992 963 1002 965 1001

772 783 961 783 993 776 989

540 578 716 568 514 569 567

416 447 469 447 473 444 478

414 444 463 443 464 443 459

380 416 445 415 402 416 422

335 353 356 353 357 353 353

300 332 339 331 322 332 335

224 304 183 305 183 305 224

216 301 175 302 176 302 182

135 244 132 245 133 245 175

135 160 45 152 38 153 132
